# Supplementary material
Source: publisher site journal article supplement (https://www.dovepress.com/article/226630)
Supplement: Supplementary file 1 [file get_supplementary_file.php]

**Supplementary Data**

**Advanced Mg, Zn, Sr, Si multi-substituted hydroxyapatites for bone regeneration**

Corina Garbo, Janis Locs, Matteo D’Este, Gerard Demazeau†, Aurora Mocanu, Cecilia Roman, Ossi Horovitz and Maria Tomoaia-Cotisel


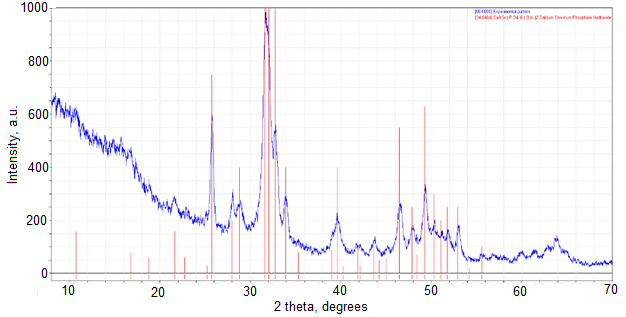


**Figure S1** Comparison of experimental XRD pattern for calcined HAPc-10%Sr with PDF 34-0484 for Ca9Sr(PO4)6(OH)2, red lines.

**Table S1** Characteristic wave numbers (in cm-1) of the main absorption maxima in the FTIR spectra of the eight hydroxyapatites

| 1  HAP  non calc. | 2  HAP  calc. | 3  HAPc  non  calc. | 4  HAPc calc. | 5  HAPc­-  5%Sr  non  calc. | 6  HAPc-5%Sr  calc. | 7  HAPc-  10%Sr  non calc. | 8  HAPc-  10%Sr  calc. | Assignment of vibrations |
| --- | --- | --- | --- | --- | --- | --- | --- | --- |
| 3570  3438  1635  -  1421  1094  **1043**  962  875  634  603  567  472 | 3571  3435  1631  1446  1415  1093  **1043**  962  -  633  604  567  473 | 3567  3430  1635  1457  1422  1097  **1038**  963  875  sh  604  565  (472) | 3569  3431  1632  1451  1416  1096  **1037**  963  876  630  604  566  473 | 3565  3420  1634  1452  1419  1096  **1037**  962  875  sh  604  565  472 | 3568  3430  1634  1448  1416  1095  **1041**  962  877  sh  604  565  472 | sh  3429  1633  1446  1419  1095  **1040**  961  875  sh  603  565  472 | 3568  3431  1637  1447  1417  1094  **1038**  961  876  sh  603  565  472 | stretching: structural O-H from HAP  O-H…O stretching –abs. water with H-bonding  absorbed water bending mode ν2  CO32-  CO32-  PO4 asymmetric stretching ν3  -“-  PO4 symmetric stretching ν1 (forbidden in IR)  CO32-  structural OH – libration  PO4 asymmetric bending ν4  -“-  PO4 symmetric bending ν2 |

**Abbreviations:** sh = shoulder; abs. water = absorbed water; non calc. = non calcined lyophilized; calc. = calcined lyophilized; values for the highest absorption peak are listed in bold.


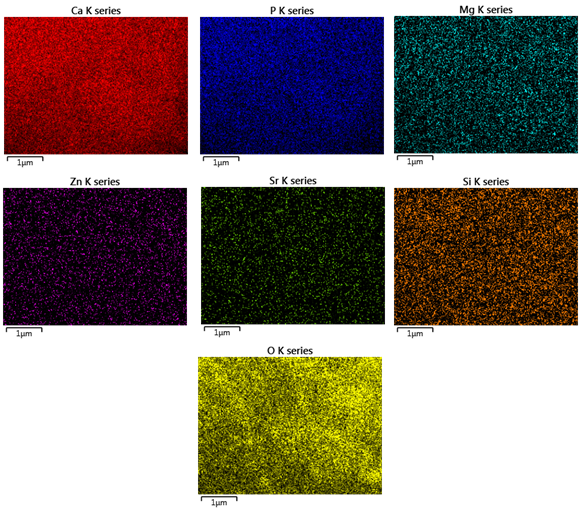


**Figure S2** Calcined lyophilized HAPc-5%Sr (sample 6, in Table 1): distribution maps of individual elements, as given by EDX spectrum.

**
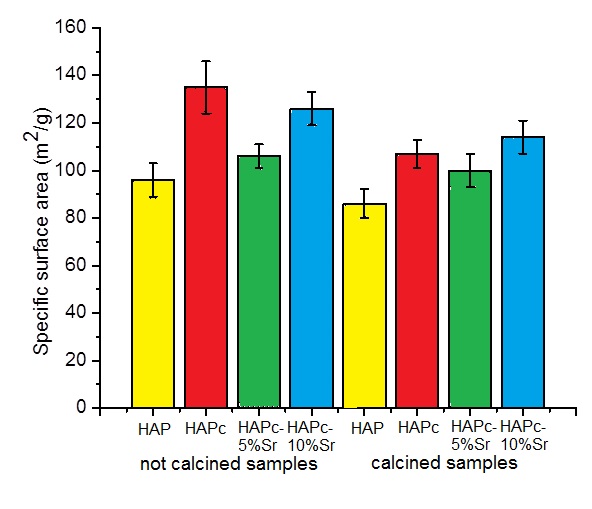
**

**Figure S3** Specific surface areas of all investigated nano powders; error bars indicate the standard deviations.


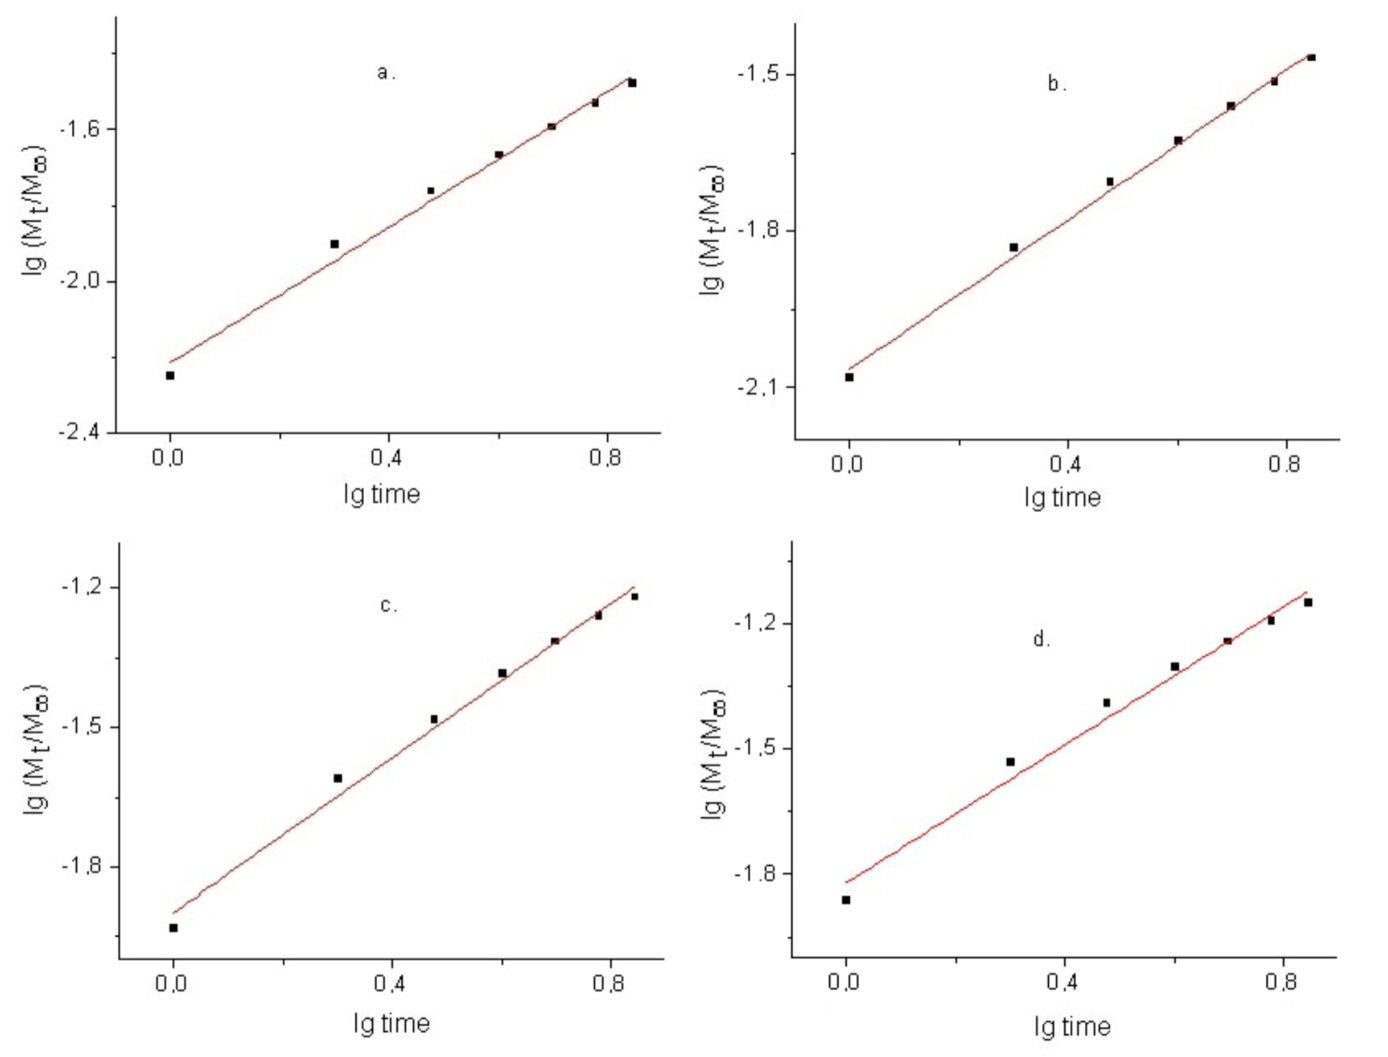


**Figure S4** Korsmeyer-Peppas regression lines for strontium release profiles from HAPc-5%Sr non calcined in water (a) and in SBF (c) as well as from HAPc-5%Sr calcined in water (b) and in SBF (d).
